# Supplementary material for: Fast and Efficient Drosophila melanogaster Gene Knock-Ins Using MiMIC Transposons
Source: PubMed Central journal article supplement (PMC4267933; doi:10.1534/g3.114.014803), 2014-10-08

**Fast and efficient *Drosophila melanogaster* gene knock-ins using MiMIC transposons**

Sven Vilain<sup>\*,§,1</sup>, Roeland Vanhauwaert<sup>\*,§,1</sup>, Ine Maes<sup>\*,§</sup>, Nils Schoovaerts<sup>\*,§</sup>, Lujia Zhou<sup>\*,§</sup>, Sandra Soukup<sup>\*,§</sup>, Raquel da Cunha<sup>\*,§</sup>,  
Elsa Lauwers<sup>\*,§</sup>, Mark Fiers<sup>§</sup> and Patrik Verstreken<sup>\*,§,2</sup>

\* KU Leuven, Department of Human Genetics and Leuven Research Institute for Neuroscience and Disease (LIND), 3000 Leuven,  
Belgium

§ VIB Center for the Biology of Disease, 3000 Leuven, Belgium

<sup>1</sup>These authors contributed equally to this work.

<sup>2</sup> Corresponding author

## SUPPORTING MATERIAL

Protocol S1: Bioinformatics protocol to generate Figure 1.

# 1 Analysis of all genes within 70k of a MiMIC

Mark Fiers

Version: June 2014

This document is created with iPython (<http://ipython.org/>) and makes use of the Python Pandas (<http://pandas.pydata.org/>) and Matplotlib (<http://matplotlib.org/>) libraries.

## 1.1 Approach

The analysis starts with a list of MiMIC elements and a list of genes. Subsequently, we check how many genes fall within a predefined range around each MiMIC element. We search for two types of overlap: one requires a gene to completely fall within the range; the other requires a gene to overlap with at least one nucleotide.

## 1.2 Load python libraries

```
In [23]: #Pandas dataframes
import pandas as pd
#Graphs
import matplotlib.pyplot as plt
```

## 1.3 Download the MiMIC list

The following list was downloaded: <http://flypush.imgen.bcm.tmc.edu/pscreen/files/MI-list-2014-06-13.xls> and converted this (using openoffice) to tsv. A minor adaptation of the column names was applied for ease of processing.

This list has 6507 entries.

```
In [9]: #milist = pd.read_csv("MiList.csv", sep="\t")
milist = pd.read_csv("MI-list-2014-06-13.csv", sep="\t")

# clean up column names
milist.columns = [x.lower().strip() for x in milist.columns]

# extract location into a separate chromosome and position field
splitup = milist['location'].str.split(':')
milist['chrom'] = splitup.str[0]
```

Extract position information from the list of MiMIC elements:

```
In [10]: def get_pos(x):
s = x.split(' ')
p = s[0].strip()
o = s[1].replace(']', '').strip()
```

```

    try:
        return int(p), o
    except:
        return -1, o

_pos, _ori = zip(*splitup.str[1].map(get_pos))
milist[' pos' ] = _pos
milist[' orient' ] = _ori

print "Removing %d entries with unspecified positions" % len(milist[milist[' pos' ] == -1])
milist = milist[milist[' pos' ] != -1]
print "Kept %d records" % len(milist[milist[' pos' ] != -1])

```

Removing 139 entries with unspecified positions  
Kept 6367 records

```

In [11]: # making a few shortcuts for later
mchrom = milist[' chrom' ] #shortcut for later
mpos = milist[' pos' ] #and another one

# create two empty fields to contain the genes and CDSs
# within 70k of each element
milist[' gene_in70k' ] = [set() for i in range(len(milist))]
milist[' cds_in70k' ] = [set() for i in range(len(milist))]

```

## 1.4 Load gene annotations

The gene annotation is available as a big GFF file from Flybase. Used version 5.50.  
The file was downloaded using:

```

In [45]: !wget ftp://ftp.flybase.net/genomes/Drosophila_melanogaster/dmel_r5.57_FB2014_03/gff/dmel-all-
--2014-06-17 10:33:21-- ftp://ftp.flybase.net/genomes/Drosophila_melanogaster/dmel_r5.57_FB2014_03/gff/
=> 'dmel-all-r5.57.gff.gz'
Resolving ftp.flybase.net... 149.165.226.140
Connecting to ftp.flybase.net|149.165.226.140|:21... connected.
Logging in as anonymous ... Logged in!
==> SYST ... done. ==> PWD ... done.
==> TYPE I ... done. ==> CWD (1) /genomes/Drosophila_melanogaster/dmel_r5.57_FB2014_03/gff ... done.
==> SIZE dmel-all-r5.57.gff.gz ... 377738814
==> PASV ... done. ==> RETR dmel-all-r5.57.gff.gz ... done.
Length: 377738814 (360M) (unauthoritative)

100%[======>] 377,738,814 3.06MB/s in 2m 1s

2014-06-17 10:35:24 (2.98 MB/s) - 'dmel-all-r5.57.gff.gz' saved [377738814]

```

Subsequently unzipped the file and extracted all genes using the following command - extracting only the GFF records which have the word “gene” inbetween two spaces

```

In [46]: !gunzip dmel-all-r5.57.gff.gz
!egrep "WtgeneWt" dmel-all-r5.57.gff > dmel.57.gene.gff

```

To remove all miRNA and snoRNA records (assuming we are only interested in protein coding genes):

```
In [15]: !grep -v 'mir-' dmel.57.gene.gff | grep -v 'snoRNA'
> dmel.57.gene.norg.gff
!wc -l dmel.57.gene.norg.gff
```

16771 dmel.57.gene.norg.gff

Similarly - to extract all coding (parts of) exons:  
Now loading these files into memory.

```
In [12]: #loading the gff with protein coding genes
gff_cols = ['chr', 'src', 'type', 'start', 'stop',
            'score', 'strand', 'frame', 'attr']

gff_gene = pd.read_csv("dmel.57.gene.norg.gff", sep="\t", names=gff_cols)
#convert start & stop to integers (not certain if this is necessary)
gff_gene['start'] = gff_gene['start'].map(lambda x: int(x))
gff_gene['stop'] = gff_gene['stop'].map(lambda x: int(x))

#extract the gene name from the attribute list
gff_gene['gene'] = gff_gene['attr'].map(lambda x:x.split(';')[1].split('=')[1])

#how many genes do we have?
print len(gff_gene)
```

16771

## 1.5 Map genes to MiMIC elements

A function (registerDist) is defined to assess and register for each gene which MiMIC element is nearby.

```
In [13]: def registerDist(distance, gene, gchrom, gstart,
                        gstop, column, touch_or_include="touch"):
    gstart, gstop = sorted([gstart, gstop])
    # 'touch' means - 70k touches an element
    if touch_or_include == "touch":
        # the element is on the same chromosome
        # AND MIS + distance is bigger than gene/cds start
        # AND MIS - distance is smaller than gene/cds stop
        milist[ (mchrom == gchrom) &
                (mpos >= gstart - distance) &
                (mpos <= gstop + distance)
                ][column].map(lambda x:x.add(gene))
    else:
        # 'within' means gene is fully within 70k
        milist[ (mchrom == gchrom) &
                (mpos >= gstop - distance) &
                (mpos <= gstart + distance)
                ][column].map(lambda x:x.add(gene))
```

```
In [14]: # Map genes to the MiMic elements with differing window sizes
for distance in [0, 10, 20, 30, 35, 40, 50, 60, 70, 80, 90, 100]:
    # create two empty fields to contain the genes that either
    # touch the 'distance' window, and are completely within.
    milist['gene_touch_%dk' % distance] = W
    [ set() for i in range(len(milist))]
    milist['gene_within_%dk' % distance] = W
```

```

[set() for i in range(len(milist))]

# Map gene/cds to mitos elements within/touch
gff_gene.apply(lambda x: registerDist(
    distance * 1000,
    x.name, x['chr'],
    x['start'], x['stop'],
    'gene_touch_%dk' % distance,
    "touch"),
    axis=1)
gff_gene.apply(lambda x: registerDist(
    distance * 1000,
    x.name, x['chr'],
    x['start'], x['stop'],
    'gene_within_%dk' % distance,
    "within"),
    axis=1)

```

```

In [16]: # Count how many genes are in the neighbourhood of each
# MiMIC element
for x in [0, 10, 20, 30, 35, 40, 50, 60, 70, 80, 90, 100]:
    milist['gene_count_within_%dk' % x] = W
    milist['gene_within_%dk' % x].map(lambda x: len(x))
    milist['gene_count_touch_%dk' % x] = W
    milist['gene_touch_%dk' % x].map(lambda x: len(x))

```

### 1.5.1 Export to disk

```

In [17]: milist.to_csv('MiMIC_to_gene.tsv', sep="Wt", index=False)

```

### 1.5.2 Summarize results

```

In [18]: results = pd.DataFrame(
    index=[0, 10, 20, 30, 35, 40, 50, 60, 70, 80, 90, 100])
results['gene_within'] = [0] * 12
results['gene_touch'] = [0] * 12

```

```

In [19]: #calculate numbers of unique genes per category
def get_unique_sum(cat):
    allgenes = set()
    milist[cat].map(lambda x: allgenes.update(x))
    return len(allgenes)

for x in [0, 10, 20, 30, 35, 40, 50, 60, 70, 80, 90, 100]:
    for c2 in ['within', 'touch']:
        results['gene_%s' % (c2)][x] = get_unique_sum('gene_%s_%dk' % (c2, x))
        results['gene_%s_frac' % (c2)] = results['gene_%s' % c2] / float(len(gff_gene))

print results

```

| gene_within | gene_touch | gene_within_frac | gene_touch_frac |          |
|-------------|------------|------------------|-----------------|----------|
| 0           | 0          | 3316             | 0.000000        | 0.197722 |
| 10          | 9784       | 12270            | 0.583388        | 0.731620 |
| 20          | 13618      | 14824            | 0.811997        | 0.883907 |
| 30          | 15088      | 15686            | 0.899648        | 0.935305 |

|     |       |       |          |          |
|-----|-------|-------|----------|----------|
| 35  | 15471 | 15908 | 0.922485 | 0.948542 |
| 40  | 15710 | 16051 | 0.936736 | 0.957069 |
| 50  | 16033 | 16236 | 0.955995 | 0.968100 |
| 60  | 16220 | 16357 | 0.967146 | 0.975315 |
| 70  | 16333 | 16417 | 0.973883 | 0.978892 |
| 80  | 16391 | 16453 | 0.977342 | 0.981039 |
| 90  | 16437 | 16482 | 0.980085 | 0.982768 |
| 100 | 16470 | 16500 | 0.982052 | 0.983841 |

```
In [31]: %matplotlib inline
plt.figure(figsize=(10,6))
plt.plot(results.index, results['gene_touch_frac'], label="gene touch")
plt.plot(results.index, results['gene_within_frac'], label="gene within")
plt.xlabel("Distance to the MiMic element (kb)")
plt.ylabel("Fraction of genes")
plt.vlines(70, 0, 1, label="70k")
plt.vlines(35, 0, 1, "green", label="35k")

plt.legend(loc=4)
plt.savefig("MiMic.take2.genes.vs.distance.png", dpi=300)
```

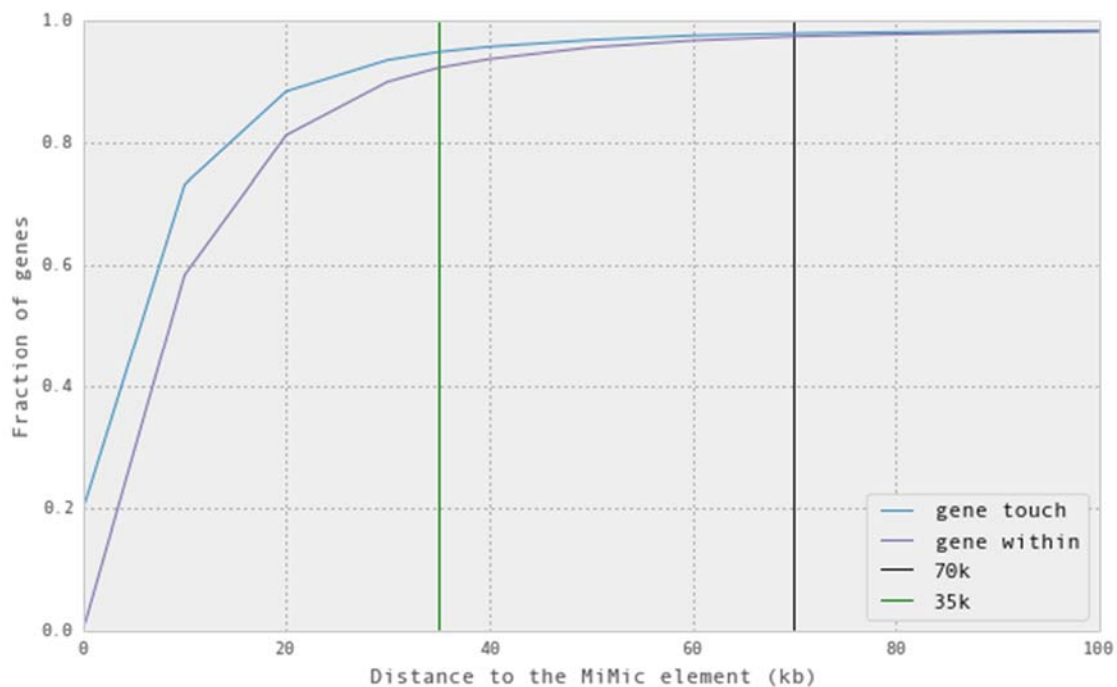

```
In [29]: milist['genecount_within_70k'] = milist['gene_within_70k'].map(len)
x = milist['genecount_within_70k'].hist(bins=range(0,100,5))
x.set_xlabel("No of genes within 70k of a MiMic Element")
x.set_ylabel("No of MiMic elements")
x.set_xlim(0, 100)
plt.savefig("MiMICDistributionGene.70k.png", dpi=300)
```

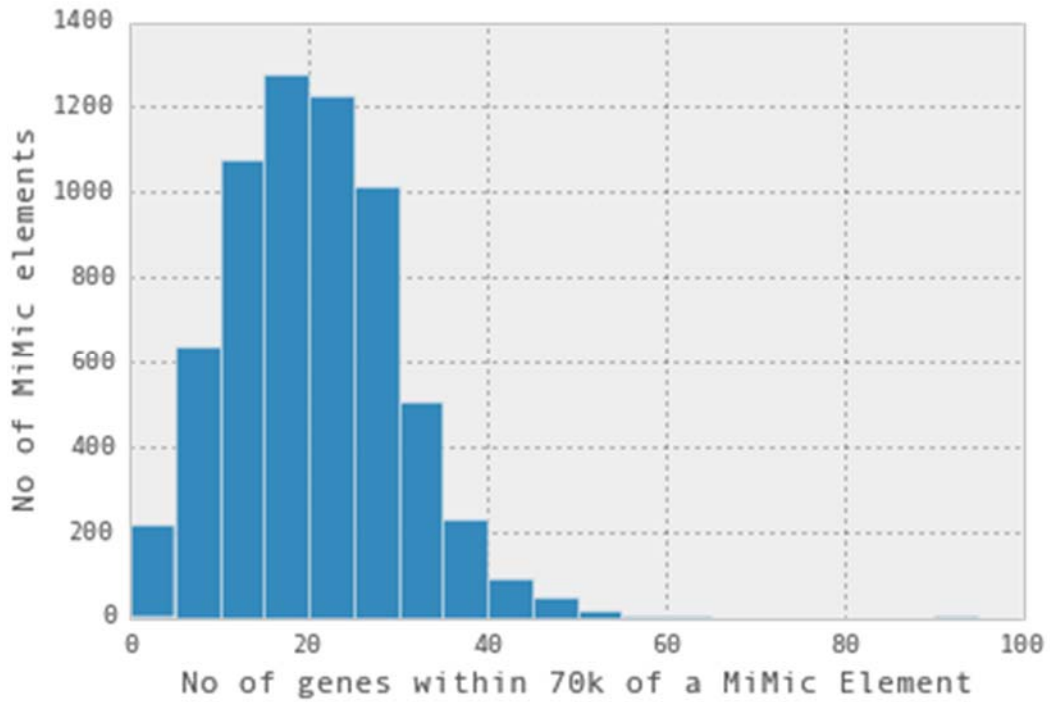

```
In [30]: milist['genecount_within_35k'] = milist['gene_within_70k'].map(len)
x = milist['genecount_within_35k'].hist(bins=range(0,100,5))
x.set_xlabel("No of genes within 35k of a MiMic Element")
x.set_ylabel("No of MiMic elements")
x.set_xlim(0, 100)
plt.savefig("MiMicDistributionGene.35k.png", dpi=300)
```

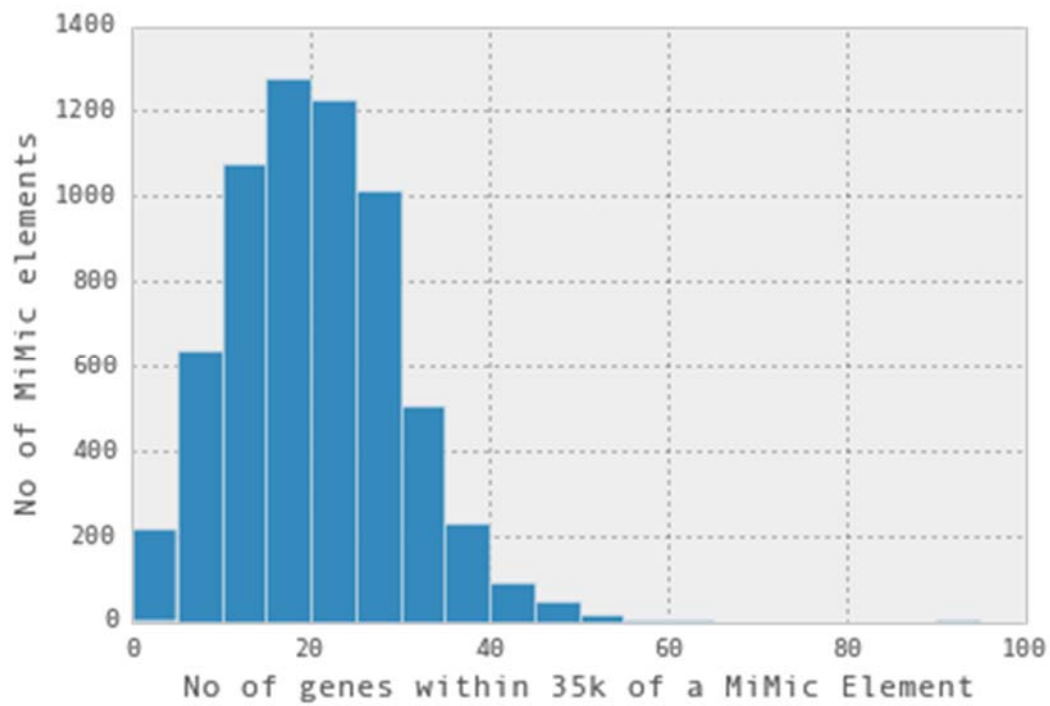

Supplement: supp_g3.114.014803_FileS2.pdf [file supp_g3.114.014803_FileS2.pdf]
