# Supplementary material for: Fast and Efficient Drosophila melanogaster Gene Knock-Ins Using MiMIC Transposons
Source: PubMed Central journal article supplement (PMC4267933; doi:10.1534/g3.114.014803), 2014-10-08
Supplement: supp_g3.114.014803_FigureS1.pdf [file supp_g3.114.014803_FigureS1.pdf]

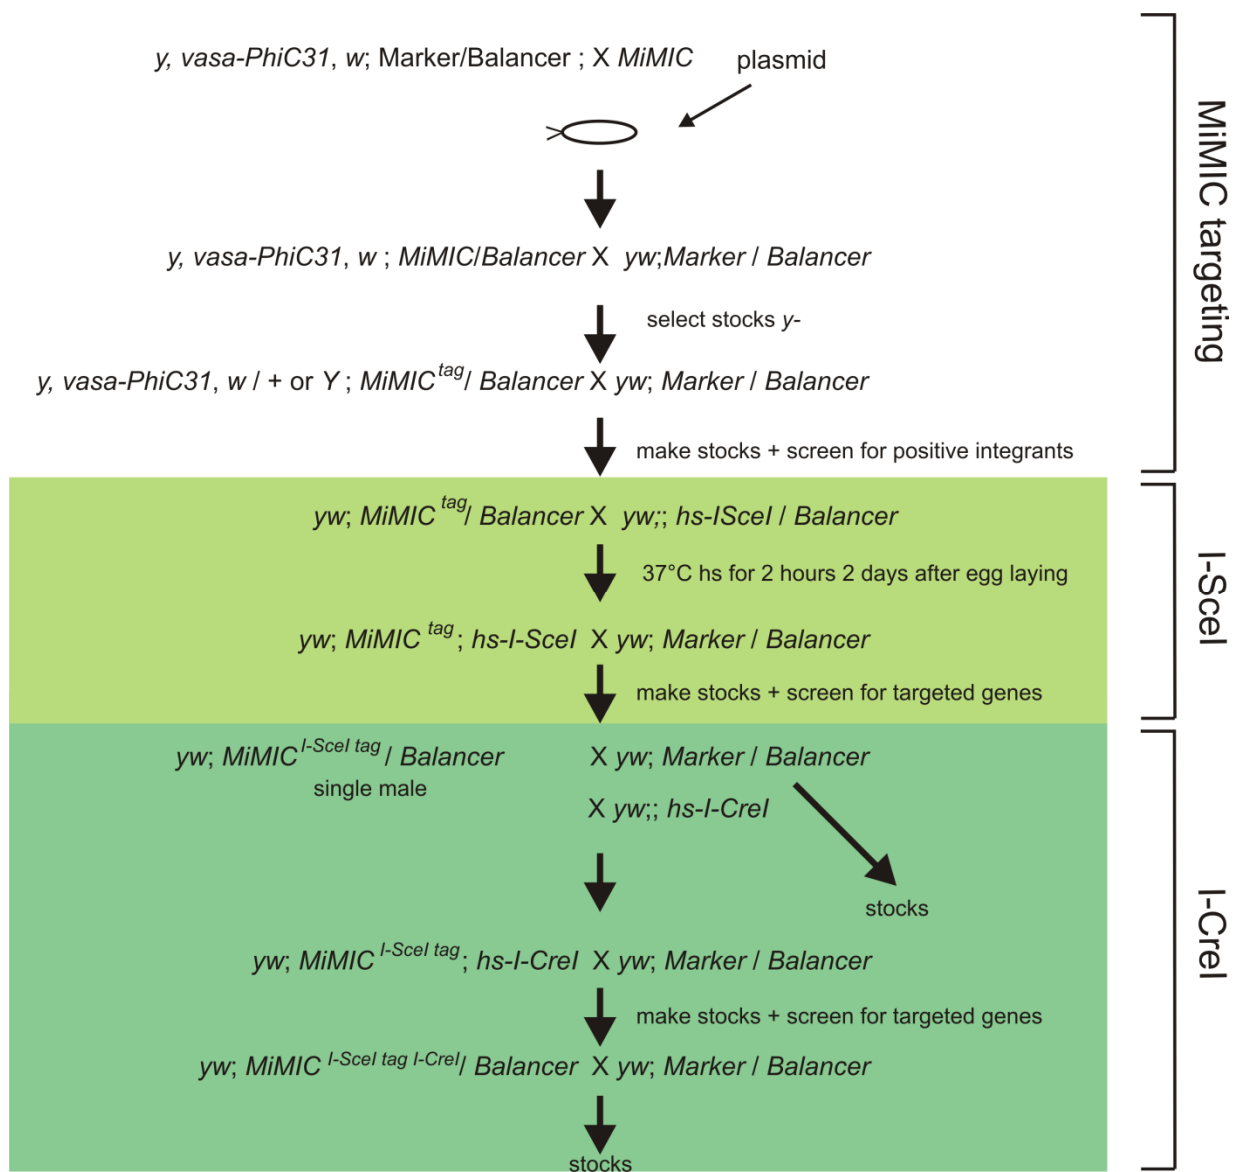

**Figure S1** Overview of the crossing scheme used to create double strand breaks using restriction endonucleases I-SceI and I-CreI. During the MiMIC targeting step, the targeting plasmid is injected in embryos from flies bearing the MiMIC of interest (here for example on the 2<sup>nd</sup> chromosome) and the PhiC31 integrase. After crossing out these mosaic flies, screening for loss of yellow indicates the integration of the targeting construct in the MiMIC site. Next a stock is established and screening by PCR for integrants in the correct orientation is done. Upon I-SceI expression (light green) by crossing the  $yw; MiMIC^{tag}/Balancer$  stock to flies expression I-SceI under a heat shock promoter, a DSB will be generated after given a heat shock, followed by repair. After crossing out these mosaic flies the next generation will yield males that are non mosaic, since I-SceI is very efficient these males can be either used to set up stocks first or crossed simultaneous with flies that express I-CreI under heat shock promoter and flies that allow us to set up stocks. Upon I-CreI expression a DSB will be generated after a heat shock treatment, followed by repair. After crossing out these mosaic flies stocks can be set and screened for targeted genes by PCR. (dark green) (every arrow is one generation)
