# Supplementary material for: Fast and Efficient Drosophila melanogaster Gene Knock-Ins Using MiMIC Transposons
Source: PubMed Central journal article supplement (PMC4267933; doi:10.1534/g3.114.014803), 2014-10-08
Supplement: supp_g3.114.014803_FigureS2.pdf [file supp_g3.114.014803_FigureS2.pdf]

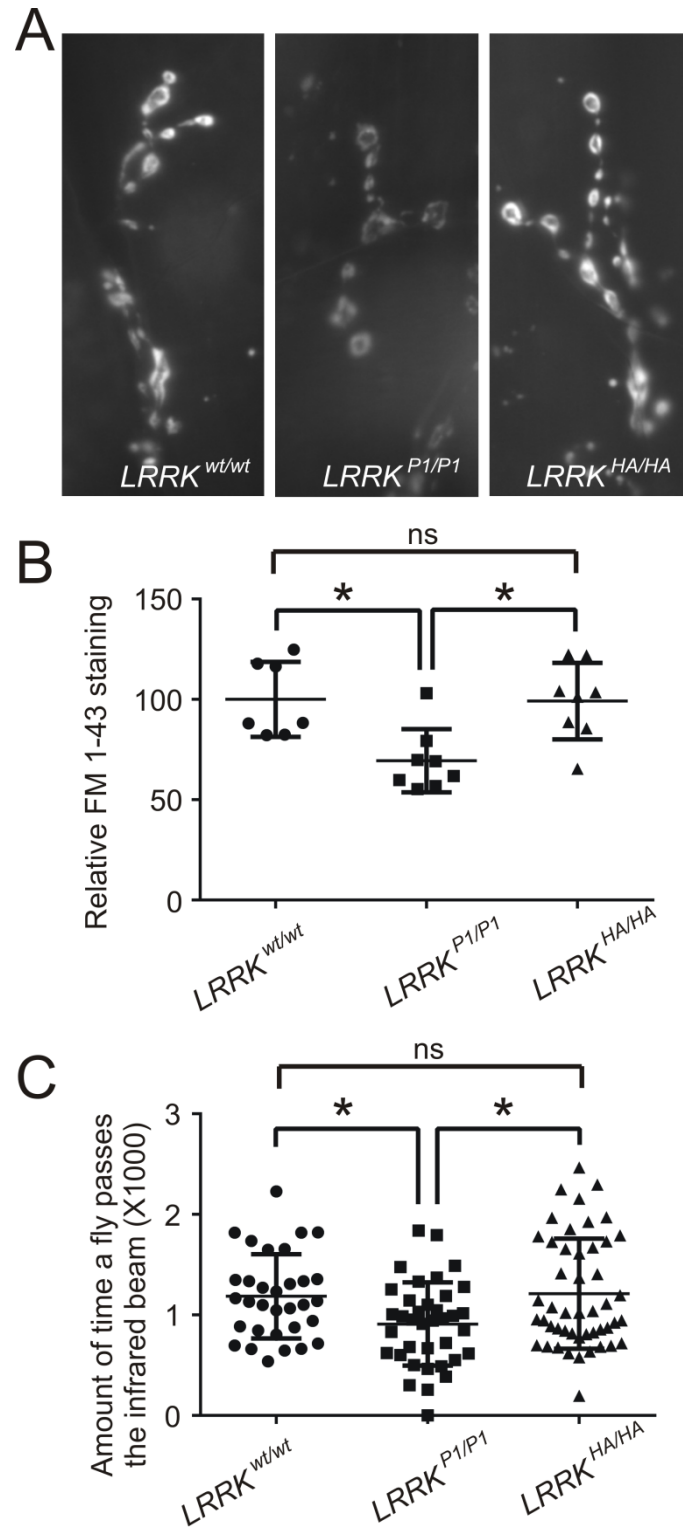

**Figure S2** *LRRK<sup>HA</sup>* recapitulates wild type *LRRK* function. (A) FM 1-43 staining following a 1 min 90 mM KCl stimulation protocol in larval boutons of wild type *LRRK* (*LRRK<sup>wt/wt</sup>*), mutant *LRRK* (*LRRK<sup>P1/P1</sup>*) and HA-tagged *LRRK* (*LRRK<sup>HA/HA</sup>*), (B) indicating a defect in FM 1-43 dye uptake in mutant *LRRK<sup>P1</sup>* but not in HA-tagged *LRRK<sup>HA</sup>* compared to wild type. Thereby showing reduced synaptic vesicle endocytosis in *LRRK<sup>P1</sup>*, not present in HA-tagged *LRRK<sup>HA</sup>*. (C) Trikinetics activity assay indicating total activity counts over a 24 h period of the same genotypes as in (A) en (B). A defect in total activity in mutant *LRRK<sup>P1</sup>* but not in HA-tagged *LRRK<sup>HA</sup>* compared to wild type *LRRK* is evident.
